# Supplementary material for: What do healthcare professionals want from a resource to support person-centred conversations on physical activity? A mixed-methods, user-centric approach to developing educational resources
Source: HighWire-hosted journal article supplement (doi:10.1136/bmjsem-2021-001280), 2022-06-01
Supplement: bmjsem-2021-001280supp001_data_supplement.pdf [file bmjsem-2021-001280supp001_data_supplement.pdf]

# Supplementary file 1. Summary of relevant findings from scoping review<sup>1</sup>

## Current practice

- Healthcare professionals view physical activity as an important part of clinical care <sup>2–5</sup>.
- Healthcare professionals frequently lack knowledge and skills around physical activity and behavioural change counselling <sup>3,6–8</sup> reflecting historically inadequate training and education <sup>9–15</sup>
- Healthcare professionals with low confidence in behaviour change skills seldom talk about physical activity, missing most of the opportunities they identify <sup>4,7,16–18</sup> often avoiding them for fear of offending people <sup>3,17,19,20</sup>
- Physically active healthcare professionals talk more frequently and effectively about physical activity <sup>6,16,17,19</sup>
- Many healthcare professionals resort to communication styles that make people less likely to become active and engage with support <sup>4</sup>
- Physical activity conversations are observed less frequently with lower socioeconomic groups, non-white ethnic groups, and those without private health insurance in countries without state-delivered healthcare <sup>3,21,22</sup>

## Patient perspective

- The majority of people attending healthcare are interested in physical activity and welcome conversations <sup>16</sup>
- Patients value integrated multidisciplinary support, the use of common language and consistent messaging <sup>19,23,24</sup>
- Patients recommend healthcare professionals avoid a ‘preaching’ style of conversation or give unsolicited advice to reduce defensive responses <sup>19,25,26</sup>
- Patient initiation promotes more frequent conversations on physical activity and increases exploration of individual values and agendas. <sup>26</sup>
- Being non-judgemental and spending time to build confidence are skills that patients value <sup>19,27</sup>

## Training considerations

- Time is the primary barrier to conversations on physical activity <sup>3,5,7,16,17,28</sup>
- Lack of training on behaviour change skills is a more prevalent barrier for healthcare professionals than knowledge around physical activity and disease <sup>3,7,17,19,28</sup>
- Healthcare professionals are typically trained to provide information and direction rather than to establish collaborative relationships with patients <sup>25</sup>
- Traditional training and engrained consulting models make it hard for clinicians to change their consultation approach <sup>29</sup>
- Healthcare professionals value counselling strategies such as motivational interviewing, but many have reservations that they too complicated and time consuming <sup>29,30</sup>
- Well-designed post-graduate education on physical activity is well received by healthcare professionals and can be transformative in the way they approach conversations. <sup>30,31</sup>
- Professional leaders, personal contacts and partnerships with professional bodies improve engagement in education programmes <sup>16,32</sup>

## Conversational structure

- A flexible approach addressing knowledge and skill deficits and balancing physical activity conversations with other clinical objectives is of fundamental importance<sup>7</sup>
- A range of conceptual frameworks exists to support physical activity conversations. It remains unclear what is most effective or the best fit for clinical practice<sup>33–38</sup>
- Reported approaches include motivational interviewing, physical activity screening tools, behaviour change techniques, multimodal approaches and consultation constructs such as the '5As' strategy<sup>30,32,39–41</sup>
- Motivational interviewing is an effective and increasingly popular framework to support the development of self-efficacy and patient-led behavioural change in clinical practice<sup>42–44</sup>
- Screening tools can provide useful prompts for physical activity and can help systems capture physical activity data<sup>16,39,45</sup>

### Clinical practice

- Prompt strategies can be useful for both healthcare professionals and patients<sup>3,26,46,47</sup>
- Patients and clinicians value information booklets, workbooks and practical instructions to support consultation<sup>3,30,39,41,46</sup>
- Walking interventions and motivational support appear to be the most efficacious and time-efficient interventions<sup>30,43,47–52</sup>
- Integration of physical activity counsellors into care pathways can help save clinical time, impart physical activity and health knowledge that healthcare professionals may not have, and deliver good quality behavioural change support<sup>24,53,54</sup>
- Healthcare professionals using frameworks such as 5 As and FRAMES generally focus on Assess and Advise stages, delivering premature, clinician-driven plans. This approach omits key steps for long term behavioural change, such as building self-efficacy and confidence<sup>2,26,27,55</sup>
- The confidence around the risks of physical activity is low for both healthcare professionals and people living with health conditions<sup>27,56,57</sup>

### Designing pathways

- Keeping workload low and considering time implications is critical for acceptability amongst healthcare professionals<sup>16,20,45,58</sup> so interventions should integrate with existing care pathways<sup>7,50</sup>
- Straightforward, time-efficient protocols are well received and may be vital for supporting healthcare professionals with limited skills and experience<sup>3,16,46,59,60</sup>
- Care pathways benefit from simplicity and intersectoral cooperation<sup>30,54,61</sup>
- Healthcare professionals need their role in physical activity pathways clarified<sup>7,17,54</sup>

### System considerations

- Blanket physical activity promotion and over-reliance on the impact of individual practitioner advice (particularly physicians) are ineffective strategies when employed in isolation<sup>25,27,53</sup>
- Strategic and organisationally driven approaches are essential to achieve an extensive cultural shift in healthcare<sup>3,62,63</sup>
- System reimbursement is essential, driving adequate resourcing and powerfully impacting healthcare professional behaviour<sup>3,20,64</sup>
- Interventions costing less than £30,000 per Quality of Life Year (QALY) are considered cost-effective to commission. NICE estimate that the cost of a QALY through a brief physical activity conversation is between £20 and £440, making it a highly cost-effective intervention compared to usual care<sup>21,25,35,49,51,65–67</sup>

## References

1. Reid H, Caterson J, Copeland RJ. What makes a good clinical conversation on physical activity? A Scoping review exploring what is known to inform the development of physical activity resources to support healthcare professionals in routine practice. *OSF Prepr.* 2021. doi:10.31219/OSF.IO/WBPXA
2. Diehl K, Mayer M, Mayer F, et al. Physical activity counseling by primary care physicians: attitudes, knowledge, implementation, and perceived success. *J Phys Act Health.* 2015;12(2):216-223. doi:10.1123/jpah.2013-0273
3. Huijg JM, van der Zouwe N, Crone MR, et al. Factors Influencing Primary Health Care Professionals' Physical Activity Promotion Behaviors: A Systematic Review. *Int J Behav Med.* 2015;22(1):32-50. doi:10.1007/s12529-014-9398-2
4. Hunter C, Chew-Graham CA, Langer S, et al. "I wouldn't push that further because I don't want to lose her": A multiperspective qualitative study of behaviour change for long-term conditions in primary care. *Heal Expect.* 2015;18(6):1995-2010. doi:10.1111/hex.12304
5. Patel A, Schofield GM, Kolt GS, Keogh JWL. General practitioners' views and experiences of counselling for physical activity through the New Zealand Green Prescription program. *BMC Fam Pract.* 2011;12:119. doi:10.1186/1471-2296-12-119
6. Lobelo F, de Quevedo IG. The Evidence in Support of Physicians and Health Care Providers as Physical Activity Role Models. *Am J Lifestyle Med.* 2014;10(1):1559827613520120-. doi:10.1177/1559827613520120
7. Albert FA, Crowe MJ, Malau-Aduli AEO, Malau-Aduli BS. Physical activity promotion: A systematic review of the perceptions of healthcare professionals. *Int J Environ Res Public Health.* 2020;17(12):1-36. doi:10.3390/ijerph17124358
8. Chatterjee R, Chapman T, Brannan MG, Varney J. GPs' knowledge, use, and confidence in national physical activity and health guidelines and tools: a questionnaire-based survey of general practice in England. *Br J Gen Pract.* 2017;67(663):e668-e675. doi:10.3399/bjgp17X692513
9. Levy MD, Loy L, Zatz LY. Policy approach to nutrition and physical activity education in health care professional training. *Am J Clin Nutr.* 2014;99(5 Suppl):1194S-201S. doi:10.3945/ajcn.113.073544
10. Dacey ML, Kennedy MA, Polak R, Phillips EM. Physical activity counseling in medical school education: a systematic review. *Med Educ Online.* 2014;19:24325. doi:10.3402/MEO.V19.24325
11. Kordi R, Moghadam N, Rostami M. Sports and exercise medicine in undergraduate medical curricula in developing countries: a long path ahead. *Med Educ Online.* 2011;16. doi:10.3402/meo.v16i0.5962
12. Weiler R, Chew S, Coombs N, Hamer M, Stamatakis E. Physical activity education in the undergraduate curricula of all UK medical schools: are tomorrow's doctors equipped to follow clinical guidelines? *Br J Sports Med.* 2012;46(14):1024-1026. doi:10.1136/bjsports-2012-091380
13. Connaughton A V, Weiler RM, Connaughton DP. Graduating medical students' exercise

prescription competence as perceived by deans and directors of medical education in the United States: implications for Healthy People 2010. *Public Health Rep.* 2001;116(3):226-234. doi:10.1093/phr/116.3.226

14. Cardinal BJ, Park EA, Kim M, Cardinal MK. If Exercise Is Medicine, Where Is Exercise in Medicine? Review of U.S. Medical Education Curricula for Physical Activity-Related Content. *J Phys Act Heal.* 2015;12(9):1336-1343. doi:10.1123/jpah.2014-0316
15. Milton K, Larner J, Hanson S, Jones A. Embedding Physical Activity into the Healthcare Curriculum—A Case Study. *Educ Prim Care.* 2020;31(3):176-179. doi:10.1080/14739879.2020.1744193
16. Allenspach EC, Handschin M, Kutlar Joss M, et al. Patient and physician acceptance of a campaign approach to promoting physical activity: the “Move for Health” project. *Swiss Med Wkly.* 2007;137(19-20):292-299.
17. Hebert ET, Caughy MO, Shuval K. Primary care providers’ perceptions of physical activity counselling in a clinical setting: a systematic review. *Br J Sports Med.* 2012;46:625-631. doi:10.1136/bjsports-2011-090734
18. Bull FC, Schipper EC, Jamrozik K, Blanksby BA. How can and do Australian doctors promote physical activity? *Prev Med (Baltim).* 1997;26(6):866-873. doi:10.1006/pmed.1997.0226
19. Keyworth C, Epton T, Goldthorpe J, Calam R, Armitage CJ. Perceptions of receiving behaviour change interventions from GPs during routine consultations: A qualitative study. *PLoS One.* 2020;15(5). doi:10.1371/journal.pone.0233399
20. Eakin EG, Smith BJ, Bauman AE. Evaluating the Population Health Impact of Physical Activity Interventions in Primary Care—Are We Asking the Right Questions? *J Phys Act Heal.* 2005;2(2):197-215. doi:10.1123/jpah.2.2.197
21. Lamming L, Pears S, Mason D, et al. What do we know about brief interventions for physical activity that could be delivered in primary care consultations? A systematic review of reviews. *Prev Med (Baltim).* 2017;99:152-163. doi:10.1016/j.ypmed.2017.02.017
22. Heaton PC, Frede SM. Patients’ need for more counseling on diet, exercise, and smoking cessation: results from the National Ambulatory Medical Care Survey. *J Am Pharm Assoc (2003).* 2006;46(3):364-369. doi:10.1331/154434506777069516
23. Birtwistle SB, Ashcroft G, Murphy R, Gee I, Poole H, Watson PM. Factors influencing patient uptake of an exercise referral scheme: a qualitative study. *Health Educ Res.* 2019;34(1):113-127. doi:10.1093/her/cyy038
24. Berra K, Rippe J, Manson JE. Making Physical Activity Counseling a Priority in Clinical Practice. *JAMA.* 2015;314(24):1. doi:10.1001/jama.2015.16244
25. Galaviz KI, Estabrooks PA, Ulloa EJ, et al. Evaluating the effectiveness of physician counseling to promote physical activity in Mexico: an effectiveness-implementation hybrid study. *Transl Behav Med.* 2017;7(4):731-740. doi:10.1007/s13142-017-0524-y
26. Carroll JK, Fiscella K, Meldrum SC, et al. Clinician-patient communication about physical activity in an underserved population. *J Am Board Fam Med.* 2008;21(2):118-127. doi:10.3122/jabfm.2008.02.070117
27. Hillsdon M, Thorogood M, White I, Foster C. Advising people to take more exercise is ineffective: A randomized controlled trial of physical activity promotion in primary care. *Int J Epidemiol.* 2002;31(4):808-815. doi:10.1093/ije/31.4.808

28. Eakin E, Brown W, Schofield G, Mummery K, Reeves M. General practitioner advice on physical activity--who gets it? *Am J Health Promot.* 2007;21(4):225-228. doi:10.4278/0890-1171-21.4.225
29. Persson G, Brorsson A, Ekvall Hansson E, et al. Physical activity on prescription (PAP) from the general practitioner's perspective - a qualitative study. *BMC Fam Pract.* 2013;14(1):1. doi:10.1186/1471-2296-14-128
30. Beighton C, Victor C, Normansell R, et al. "It's not just about walking.....it's the practice nurse that makes it work": a qualitative exploration of the views of practice nurses delivering complex physical activity interventions in primary care. *BMC Public Health.* 2015;15:1236. doi:10.1186/s12889-015-2568-6
31. Costa EF, Guerra PH, Santos TI Dos, Florindo AA. Systematic review of physical activity promotion by community health workers. *Prev Med (Baltim).* 2015;81:114-121. doi:10.1016/j.ypmed.2015.08.007
32. Brannan M, Bernardotto M, Clarke N, Varney J. Moving healthcare professionals - a whole system approach to embed physical activity in clinical practice. *BMC Med Educ.* 2019;19. doi:10.1186/s12909-019-1517-y
33. Michie S, van Stralen MM, West R. The behaviour change wheel: a new method for characterising and designing behaviour change interventions. *Implement Sci.* 2011;6:42. doi:10.1186/1748-5908-6-42
34. Campbell A, Foster J, Stevenson C, Cavill N. *Macmillan: Promote Physical Activity.*; 2012.
35. Webb J, Foster J, Poulter E. Increasing the frequency of physical activity very brief advice for cancer patients. Development of an intervention using the behaviour change wheel. *Public Health.* 2016;133:45-56. doi:10.1016/j.puhe.2015.12.009
36. NICE. Behaviour change: individual approaches | Guidance and guidelines | NICE. *Natl Inst Heal Care Excell.* 2014;PH 49. <https://www.nice.org.uk/guidance/ph49>. Accessed February 15, 2018.
37. NICE. *Behaviour Change: General Approaches PH6.* London; 2007. <https://www.nice.org.uk/guidance/PH6>.
38. NICE. Physical activity: brief advice for adults in primary care primary care. *Natl Inst Heal care Excell Public Heal Guidel 44.* 2013;PH44(May 2013). [nice.org.uk/guidance/ph44](https://www.nice.org.uk/guidance/ph44).
39. Fowles JR, O'Brien MW, Solmundson K, Oh PI, Shields CA. Exercise is Medicine Canada physical activity counselling and exercise prescription training improves counselling, prescription, and referral practices among physicians across Canada. *Appl Physiol Nutr Metab.* 2018;43(5):535-539. doi:10.1139/apnm-2017-0763
40. Gallegos-Carrillo K, García-Peña C, Salmerón J, Salgado-de-Snyder N, Lobelo F. Brief Counseling and Exercise Referral Scheme: A Pragmatic Trial in Mexico. *Am J Prev Med.* 2017;52(2):249-259. doi:10.1016/j.amepre.2016.10.021
41. Windt J, Windt A, Davis J, Petrella R, Khan K. Can a 3-hour educational workshop and the provision of practical tools encourage family physicians to prescribe physical activity as medicine? A pre-post study. *BMJ Open.* 2015;5(7). doi:10.1136/bmjopen-2015-007920
42. Rubak S, Sandbaek A, Lauritzen T, Christensen B. Motivational interviewing: a systematic review and meta-analysis. *Br J Gen Pract.* 2005;55(513):305-312. <http://www.ncbi.nlm.nih.gov/pubmed/15826439>. Accessed April 17, 2018.

43. O'Halloran PD, Blackstock F, Shields N, et al. Motivational interviewing to increase physical activity in people with chronic health conditions: A systematic review and meta-analysis. *Clin Rehabil*. 2014;28(12). doi:10.1177/0269215514536210
44. Morton K, Beauchamp M, Prothero A, et al. The effectiveness of motivational interviewing for health behaviour change in primary care settings: a systematic review. *Health Psychol Rev*. 2015;9(2). doi:10.1080/17437199.2014.882006
45. Sallis R, Franklin B, Joy L, Ross R, Sabgir D, Stone J. Strategies for promoting physical activity in clinical practice. *Prog Cardiovasc Dis*. 2015;57(4):375-386. doi:10.1016/j.pcad.2014.10.003
46. Ackermann RT, Deyo RA, LoGerfo JP. Prompting primary providers to increase community exercise referrals for older adults: a randomized trial. *J Am Geriatr Soc*. 2005;53(2):283-289. doi:10.1111/j.1532-5415.2005.53115.x
47. Dubbert PM, Cooper KM, Kirchner KA, Meydrech EF, Bilbrew D. Effects of nurse counseling on walking for exercise in elderly primary care patients. *J Gerontol A Biol Sci Med Sci*. 2002;57(11):M733-40. doi:10.1093/gerona/57.11.m733
48. Van Hoecke A-S, Delecluse C, Bogaerts A, Boen F. The long-term effectiveness of need-supportive physical activity counseling compared with a standard referral in sedentary older adults. *J Aging Phys Act*. 2014;22(2):186-198. doi:10.1123/japa.2012-0261
49. Pears S, Morton K, Bijker M, Sutton S, Hardeman W. Development and feasibility study of very brief interventions for physical activity in primary care. *BMC Public Health*. 2015;15:333. doi:10.1186/s12889-015-1703-8
50. Cooke AB, Pace R, Chan D, Rosenberg E, Dasgupta K, Daskalopoulou SS. A qualitative evaluation of a physician-delivered pedometer-based step count prescription strategy with insight from participants and treating physicians. *Diabetes Res Clin Pract*. 2018;139:314-322. doi:10.1016/j.diabres.2018.03.008
51. Pears S, Bijker M, Morton K, et al. A randomised controlled trial of three very brief interventions for physical activity in primary care. *BMC Public Health*. 2016;16(1):1033. doi:10.1186/s12889-016-3684-7
52. Gagliardi AR, Faulkner G, Ciliska D, Hicks A. Factors contributing to the effectiveness of physical activity counselling in primary care: a realist systematic review. *Patient Educ Couns*. 2015;98(4):412-419. doi:10.1016/j.pec.2014.11.020
53. Tulloch H, Fortier M, Hogg W. Physical activity counseling in primary care: who has and who should be counseling? *Patient Educ Couns*. 2006;64(1-3):6-20. doi:10.1016/j.pec.2005.10.010
54. Leemrijse CJ, de Bakker DH, Ooms L, Veenhof C. Collaboration of general practitioners and exercise providers in promotion of physical activity a written survey among general practitioners. *BMC Fam Pract*. 2015;16(1):96. doi:10.1186/s12875-015-0316-8
55. McKenna J, Naylor PJ, McDowell N. Barriers to physical activity promotion by general practitioners and practice nurses. *Br J Sports Med*. 1998;32(3):242-247. <http://www.ncbi.nlm.nih.gov/pubmed/9773175>. Accessed August 22, 2018.
56. Hirvensalo M, Heikkinen E, Lintunen T, Rantanen T. Recommendations for and warnings against physical activity given to older people by health care professionals. *Prev Med (Baltim)*. 2005;41(1):342-347. doi:10.1016/j.ypmed.2004.11.020
57. Orrow G, Kinmonth A-L, Sanderson S, Sutton S. Effectiveness of physical activity promotion based in primary care: systematic review and meta-analysis of randomised controlled trials.

BMJ. 2012;344(mar26\_1):e1389. doi:10.1136/bmj.e1389

58. Keyworth C, Epton T, Goldthorpe J, Calam R, Armitage CJ. Are healthcare professionals delivering opportunistic behaviour change interventions? A multi-professional survey of engagement with public health policy. *Implement Sci*. 2018;13(1):122. doi:10.1186/s13012-018-0814-x
59. Eakin EG, Brown WJ, Marshall AL, Mummery K, Larsen E. Physical activity promotion in primary care: bridging the gap between research and practice. *Am J Prev Med*. 2004;27(4):297-303. doi:10.1016/j.amepre.2004.07.012
60. Houde SC, Melillo KD. Physical activity and exercise counseling in primary care. *Nurse Pract*. 2000;25(8):8,11-14,17-19. doi:10.1097/00006205-200025080-00001
61. Persson G, Brorsson A, Hansson EE, Troein M, Strandberg EL. Physical activity on prescription (PAP) from the general practitioner's perspective - a qualitative study. *BMC Fam Pract*. 2013;14. doi:10.1186/1471-2296-14-128
62. Hunter RF, Tully MA, Donnelly P, Stevenson M, Kee F. Knowledge of UK physical activity guidelines: Implications for better targeted health promotion. *Prev Med (Baltim)*. 2014;65:33-39. doi:10.1016/j.ypmed.2014.04.016
63. Robertson R, Jochelson K. Interventions that change clinician behaviour: Mapping the literature. *King's Fund, London*. 2006;(November). <https://www.nice.org.uk/media/default/about/what-we-do/into-practice/support-for-service-improvement-and-audit/kings-fund-literature-review.pdf>. Accessed January 30, 2018.
64. Märki A, Bauer GB, Angst F, Nigg CR, Gillmann G, Gehring TM. Systematic counselling by general practitioners for promoting physical activity in elderly patients: a feasibility study. *Swiss Med Wkly*. 2006;136(29-30):482-488.
65. NICE. *Four Commonly Used Methods to Increase Physical Activity*. UK: NICE Guidance; 2015. <https://www.nice.org.uk/guidance/PH2>. Accessed July 31, 2018.
66. GC V, Wilson ECF, Suhrcke M, Hardeman W, Sutton S. Are brief interventions to increase physical activity cost-effective? A systematic review. *Br J Sports Med*. 2016;50(7):408-417. doi:10.1136/bjsports-2015-094655
67. Stead LF, Buitrago D, Preciado N, Sanchez G, Hartmann-Boyce J, Lancaster T. Physician advice for smoking cessation. In: Stead LF, ed. *Cochrane Database of Systematic Reviews*. Chichester, UK: John Wiley & Sons, Ltd; 2013:CD000165. doi:10.1002/14651858.CD000165.pub4
