# Supplementary material for: What do healthcare professionals want from a resource to support person-centred conversations on physical activity? A mixed-methods, user-centric approach to developing educational resources
Source: HighWire-hosted journal article supplement (doi:10.1136/bmjsem-2021-001280), 2022-06-01
Supplement: bmjsem-2021-001280supp004_data_supplement.pdf [file bmjsem-2021-001280supp004_data_supplement.pdf]

## Supplementary file 4. Results from Delphi phase 2

| No. | Question                                                                             | % agreement | Level of agreement | Feedback theme                                                                                                                                        | Action taken                                                                                                                                                                                                                                                                                                        |
|-----|--------------------------------------------------------------------------------------|-------------|--------------------|-------------------------------------------------------------------------------------------------------------------------------------------------------|---------------------------------------------------------------------------------------------------------------------------------------------------------------------------------------------------------------------------------------------------------------------------------------------------------------------|
| 1   | The information is laid out in a coherent manner that supports clinical consultation | 83          | High agreement     | Compatibility with multiple browsers<br>Much more user-friendly<br>Home return button on each page<br>Lots of clicks to navigate<br>Lots of scrolling | N/A                                                                                                                                                                                                                                                                                                                 |
| 2   | Using patient quotes is an engaging way to make the content clinically meaningful    | 85          | High agreement     | Helps as a prompt<br>Use “physical activity” instead of “exercise”                                                                                    | N/A                                                                                                                                                                                                                                                                                                                 |
| 3   | Navigation of the resource is straightforward                                        | 77          | Moderate agreement | Need to be able to return to the home page, or get back to the previous page<br>Lots of clicks to navigate<br>Add a back button                       | <ul style="list-style-type: none"> <li>• ‘Back’ button</li> <li>• Reference to current disease area to be ever-present and work as a resource ‘home’ button</li> <li>• Upper level navigation to be added with drop down menus</li> <li>• ‘How to use this resource’ added</li> <li>•</li> </ul>                    |
| 4   | The information pop-ups contain a satisfactory amount of educational information     | 82          | High agreement     | A lot to digest if new to physical activity as a healthcare professional<br>Very helpful, makes pages a lot less overwhelming                         | N/A                                                                                                                                                                                                                                                                                                                 |
| 5   | The menu page makes it clear what to expect from the resource                        | 77          | Moderate agreement | Lots of scrolling on the page<br>Covers everything, comprehensive                                                                                     | <ul style="list-style-type: none"> <li>• Landing page of each disease resource changed with more direct instructions</li> <li>• To capitalise on navigation revisions, supporting elements added to the website including materials, campaign resources and other components such as an ‘about us’ page.</li> </ul> |
| 6   | The 'no minutes consultation' page includes an appropriate amount of information     | 75          | Moderate agreement | Still a lot to cover in “0” minutes<br>“1 minute” seems a lot more reasonable                                                                         | <ul style="list-style-type: none"> <li>• “0 minutes” changed to “1-minute conversation”</li> </ul>                                                                                                                                                                                                                  |
| 7   | Covering these objectives is achievable in a two-minute consultation                 | 77          | Moderate agreement | Covering in 2 minutes might not be achievable<br>In 2 minutes would be superficial conversations                                                      | <ul style="list-style-type: none"> <li>• “2 minutes” changed “5-minute conversation”</li> </ul>                                                                                                                                                                                                                     |

|    |                                                                                                                                                                                      |                   |                    |                                                                                                                                                    |                                                                                                                                                    |
|----|--------------------------------------------------------------------------------------------------------------------------------------------------------------------------------------|-------------------|--------------------|----------------------------------------------------------------------------------------------------------------------------------------------------|----------------------------------------------------------------------------------------------------------------------------------------------------|
| 8  | The subheadings of the more minutes consultation (Ask, Explore Benefits, Explore Concerns, Build Readiness, agree a Plan, Arrange Support) clearly signpost the content of each page | 87                | High agreement     | Difficulty navigating back to the home page<br>A lot of information, but this is helpful to tailor to the individual<br>A good flow of information | See point 3                                                                                                                                        |
| 9  | The 'physical activity calculator' is a useful screening tool for a brief intervention in physical activity                                                                          | 78                | Moderate agreement | Not easy to input information for every patient's needs<br>Great visual                                                                            |                                                                                                                                                    |
| 10 | The summary evidence statements and referencing are useful and appropriate                                                                                                           | 83                | High agreement     | Some icons not appropriate                                                                                                                         | Changed icons for certain text boxes                                                                                                               |
| 11 | This information in 'explore concerns' is presented in a clinically meaningful way                                                                                                   | 85                | High agreement     | Very good section                                                                                                                                  | N/A                                                                                                                                                |
| 12 | This is a logical sequence to support individualised physical activity prescription                                                                                                  | 87                | High agreement     | Appropriateness of terminology e.g. "play" - would leisure time be better?                                                                         | N/A                                                                                                                                                |
| 13 | Key organisations are appropriately signposted to help arrange further support                                                                                                       | 77                | Moderate agreement | Good to have locally based referral schemes<br>Hyperlinks instead of URLs                                                                          |                                                                                                                                                    |
| 14 | Do you have any further recommendations/comments for the patient information section?                                                                                                | Freetext response |                    | Different colours for different diseases                                                                                                           | <ul style="list-style-type: none"> <li>• Patient action planning, goal setting and stepping workbooks added to information for patients</li> </ul> |
| 15 | The general 'look and feel' of the designed pages make the resource:                                                                                                                 |                   |                    |                                                                                                                                                    |                                                                                                                                                    |
|    | a) credible                                                                                                                                                                          | 83                | High agreement     | Some icons not appropriate<br>More quotes                                                                                                          | Change certain icons to be more appropriate                                                                                                        |
|    | b) distinctive                                                                                                                                                                       | 81                | High agreement     | -                                                                                                                                                  | N/A                                                                                                                                                |
|    | c) inclusive                                                                                                                                                                         | 59                | Low agreement      | Some uncertainty who the website was targeted for by the images                                                                                    | Change stock images to match diseases/purpose of website more appropriately                                                                        |
|    | d) energetic                                                                                                                                                                         | 81                | High agreement     | Really like the graphics and pictures                                                                                                              | N/A                                                                                                                                                |
| 16 | The design helps discriminate between different types of information, for example core content and patient quotes                                                                    | 82                | High agreement     | -                                                                                                                                                  | Increase colour variety added to resources and greater contrast to patient information leaflets                                                    |
| 17 | The design helps prioritise information                                                                                                                                              | 82                | High agreement     | Navigation still a bit complicated                                                                                                                 | See point 3                                                                                                                                        |

As with phase 1, free text feedback was very influential in refining the tool. It also helped to illustrate why some domains had scored moderate or low agreement.

Fundamental changes, including resolution of cases low to moderate agreement, following phase 2 were as follows:

- Rethink of navigation of the site to include:
  - 'Back' button
  - Reference to current disease area to be ever-present and work as a resource 'home' button
  - Upper level navigation to be added with drop down menus
- To capitalise on navigation revisions, supporting elements added to the website including materials, campaign resources and other components such as an 'about us' page.
- Conversation components re-written to improve the flow between the 'envelope' of the conversation common content and the 'stuffing' of the page details
- Landing page of each disease resource changed with more direct instructions
- 'How to use this resource' added
- "0 minutes" changed to "1-minute conversation"
- "2 minutes" changed "5-minute conversation"
- Increase colour variety added to resources and greater contrast to patient information leaflets
- Patient action planning, goal setting and stepping workbooks added to information for patients
- Site review and standardisation by external scientific editor
